# Supplementary material for: A novel approach to chiral separation: thermo-sensitive hydrogel membranes
Source: Royal Society of Chemistry journal article supplement (doi:10.1039/d4mh00895b), 2024-01-01
Supplement: d4mh00895b1.pdf [file d4mh00895b1.pdf]

**Supporting information**

**A novel approach to chiral separation: thermal-sensitive  
hydrogel membranes**

Ziyi Huang<sup>a</sup>, Xinjie Shen<sup>a</sup>, Yuxuan Wei<sup>a</sup>, Jia Wei Chew<sup>c</sup>, Edison Huixiang Ang<sup>b\*</sup>,  
Meilan Pan<sup>a\*</sup>

<sup>a</sup> College of Environment, Zhejiang University of Technology, Hangzhou, Zhejiang  
310014, China

<sup>b</sup> Natural Sciences and Science Education, National Institute of Education, Nanyang  
Technological University Singapore, 637616, Singapore

<sup>c</sup> Department of Chemistry and Chemical Engineering, Chalmers University of  
Technology, 412 96 Gothenburg, Sweden

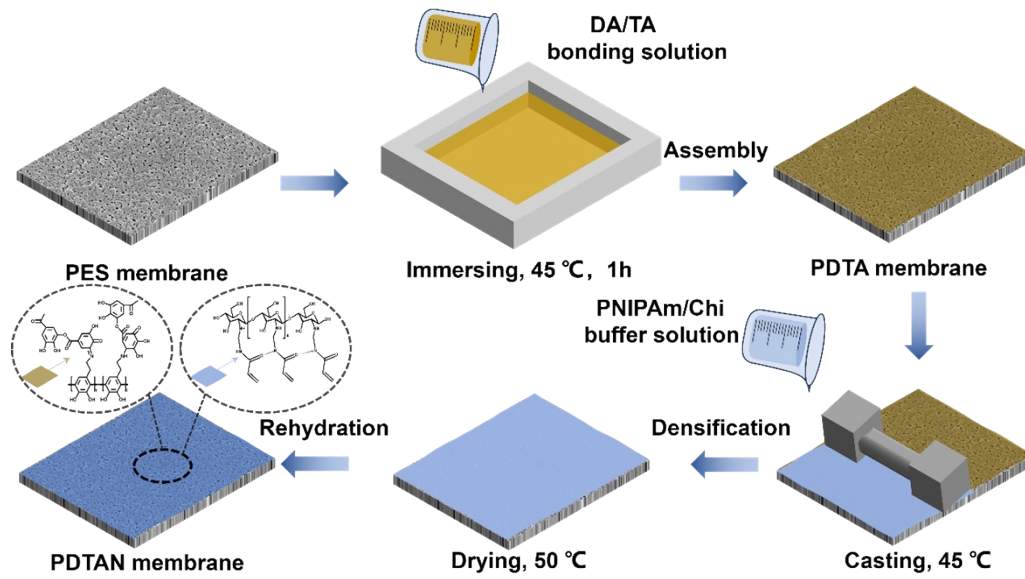

**Fig. S1** Schematic diagram of temperature-sensitive hydrogel modified membrane (PDTAN) prepared by interfacial coating method.

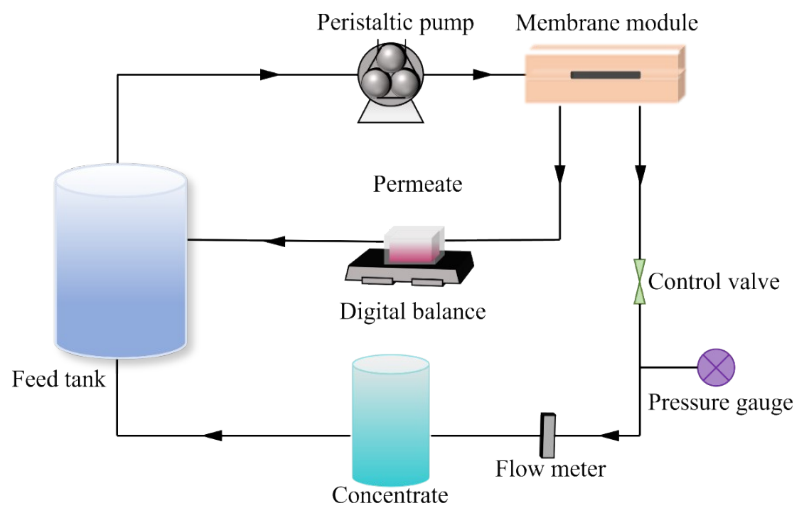

**Fig. S2** Schematic diagram of the membrane separation setup.

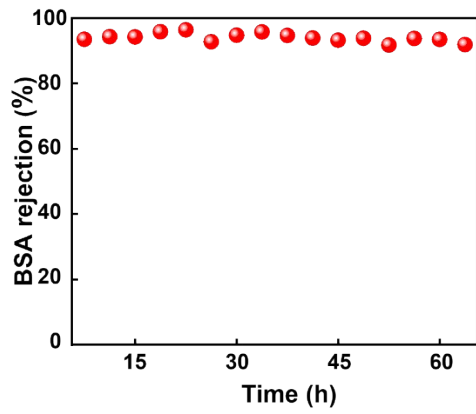

**Fig. S3** BSA rejection by PDTAN membrane.

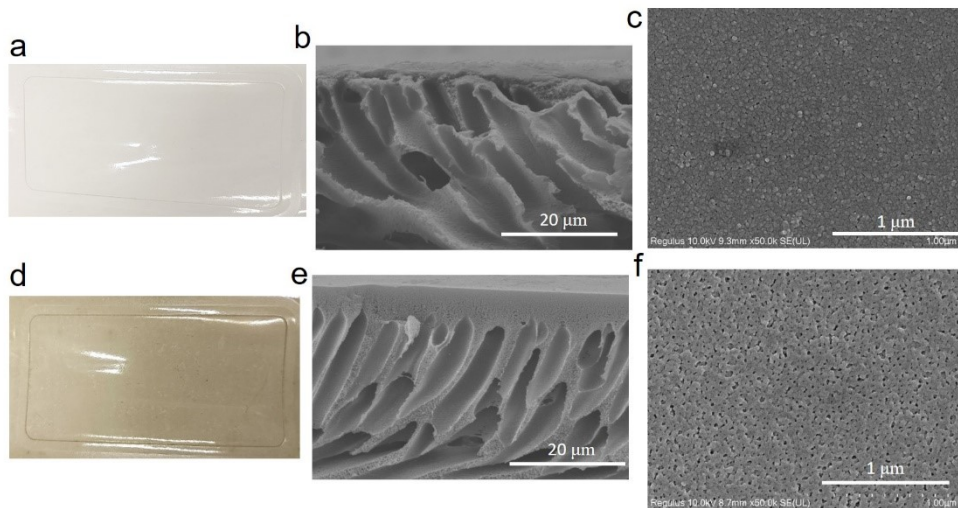

**Fig. S4.** Photo image (a, d), exterior (b, e), and sectional (c, f) view of SEM images of PES and PDTAN, respectively.

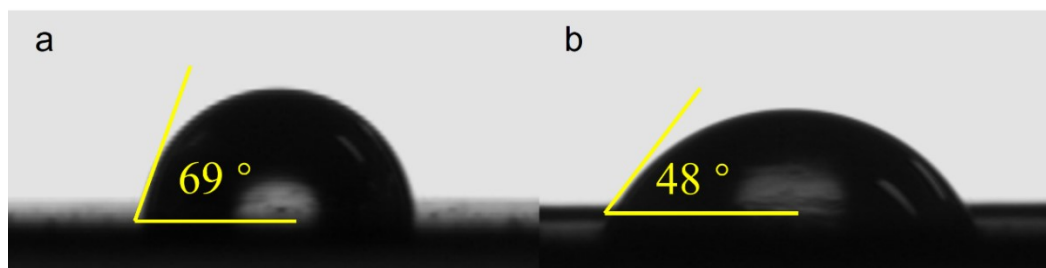

**Fig. S5** Contact angles of PES membrane (a) and PDTAN membrane (b) at 20 °C.

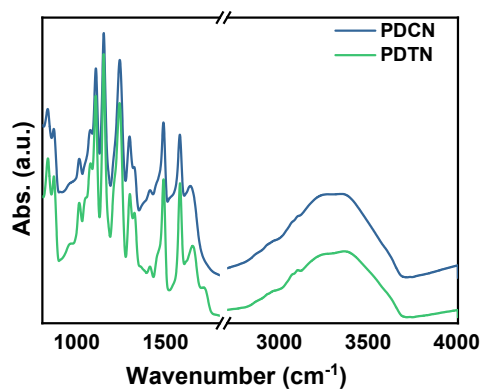

**Fig. S6** FTIR spectra of PDTN and PDCN.

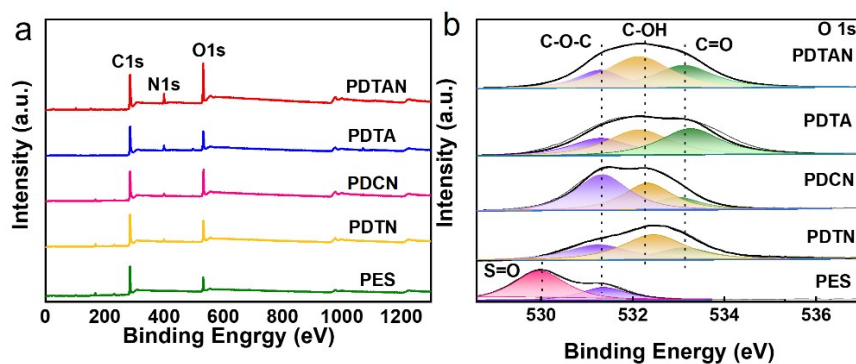

**Fig. S7** XPS spectra (a) and O 1s analysis (b) of PES, PDTN, PDCN, PDTA, and PDTAN membranes.

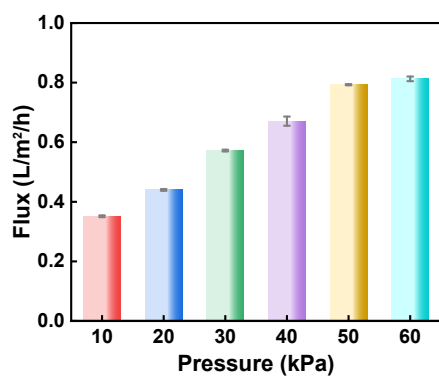

**Fig. S8.** Permeate flux of PDTAN membrane under different pressures.

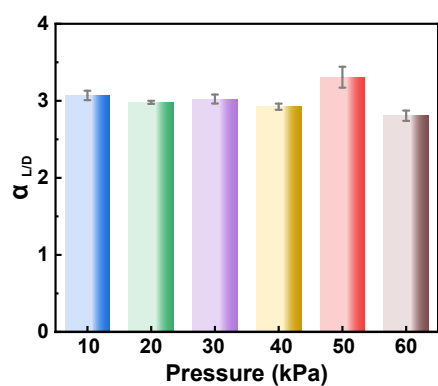

**Fig. S9** The effects of pressure on the chiral separation efficiency of PDTAN membranes.

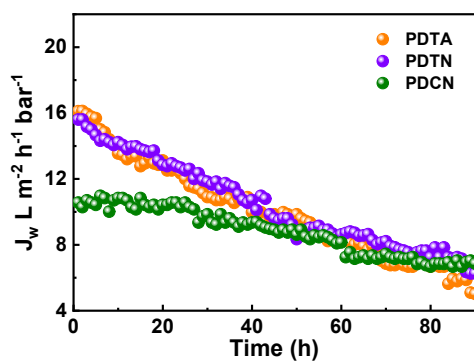

**Fig. S10**  $J_w$  of PDTA, PDTN, and PDCN membranes.

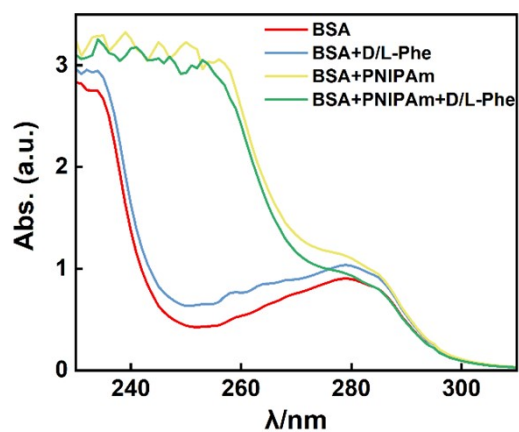

**Fig. S11** UV-vis spectra of BSA structure in different conditions.

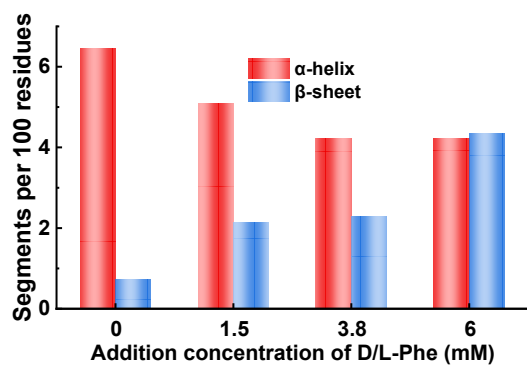

**Fig. S12** Fitting analysis of  $\alpha$ -helix and  $\beta$ -sheet segments per 100 residues in different concentrations of D,L-Phe.

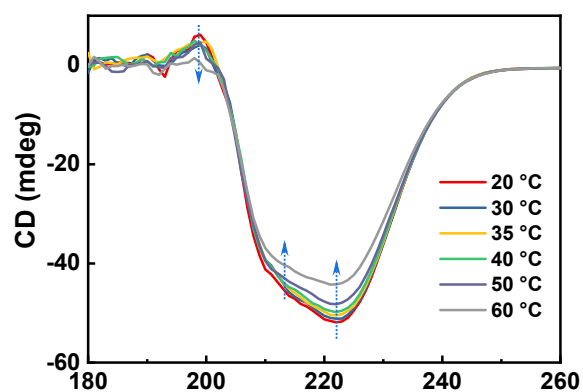

**Fig. S13** CD spectra of BSA structure ranging from 20 °C to 50 °C on PNIPAm.

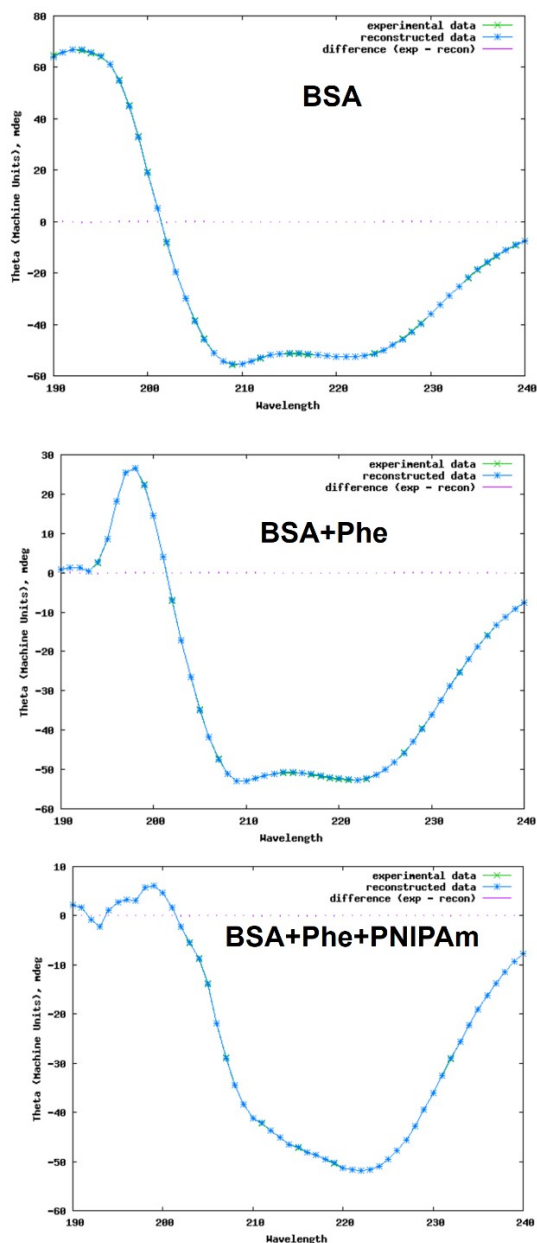

**Fig. S14** The fitting analysis of  $\alpha$ -helix and  $\beta$ -sheet segments per 100 residues by DichroWeb.

**Table S1** Comparison of chiral separation performance in membrane-based system.

| Membrane        | Selectivity ratio              | Experimental condition                         | Technique  | Ref      |
|-----------------|--------------------------------|------------------------------------------------|------------|----------|
| PDTAN           | $\alpha_{L/D} = 3.30 \pm 0.14$ | P = 0.05 bar,<br>T = 40 °C                     |            | Our work |
| Chiral membrane | $\alpha_{L/D} = 1.7$           | P = 0.1 MPa,<br>Flux = 75 kg/m <sup>3</sup> ·h | Separation | [1]      |
| PES membrane    | $\alpha_{D/L} = 2.2$           | Feed pH = 9,<br>P = 0.1 bar                    |            | [2]      |

|                                                          |                                                                                       |                                                                                                       |                 |     |
|----------------------------------------------------------|---------------------------------------------------------------------------------------|-------------------------------------------------------------------------------------------------------|-----------------|-----|
| molecularly imprinted membrane                           | L-Phe-MIM $\alpha_{L/D}$<br>=2.23<br>D-Phe-MIM $\alpha_{D/L}$<br>$\alpha_{L/D}$ =2.20 | Flux = 794.75 mmol s <sup>-1</sup> m <sup>-2</sup>                                                    | Electrodialysis | [3] |
| Molecularly imprinted organic–inorganic hybrid membranes | $\alpha_{D/L}$ =1.8                                                                   | Diffusion is carried out in the tank                                                                  | Diffusion       | [4] |
| composite imprinted membranes                            | DCM $\alpha_{D/L}$ =2.72<br>LCM $\alpha_{L/D}$ =2.98                                  | P = 1 atm                                                                                             |                 | [5] |
| L-Phe-MIPs ionic liquid                                  | $\alpha_{L/D}$ = 1.44                                                                 | The mixtures were oscillated at 35 rpm for 8 h at 25 °C, and then centrifuged at 8500 rpm for 10 min. | Adsorption      | [6] |

## References

- [1] X. Feng, Q. Zhang, X. Liang, J. Li, Y. Zhao and L. Chen, *J. Polym. Res.* **2014**, *21*, 475.
- [2] J. Tian, M. Pan, Y. Ma and J. W. Chew, *J. Membr. Sci.* **2020**, *593*, 117352.
- [3] G. Fadillah, K. Toda and S.-I. Ohira, *Sep. Purif. Technol.* **2023**, *305*, 122492.
- [4] H. Wu, Y. Zhao, M. Nie and Z. Jiang, *Sep. Purif. Technol.* **2009**, *68*, 97-104.
- [5] N. Shah, T. Rehan and J. K. Park, *Pol. J. Chem. Technol.* **2016**, *18*, 22-29.
- [6] B. Gao, P. Guan, X. Hu, L. Qian, Q. Wang, L. Yang and D. Wang, *Des. Monomers Polym.* **2014**, *18*, 185-198.
